# Supplementary material for: Evaluation of Lateral‐Flow Assay for Rapid Detection of Influenza Virus
Source: Hindawi journal article supplement (doi:10.1155/2020/3969868), 2020-01-01

Identification

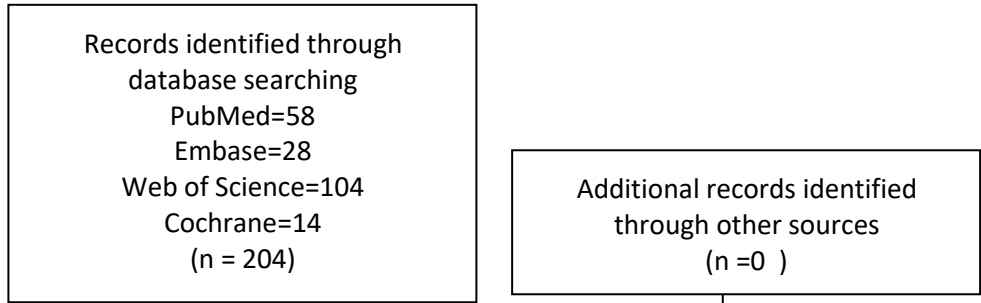

Screening

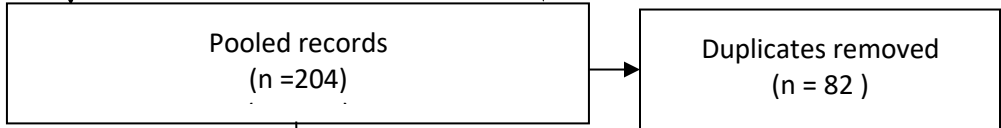

Eligibility

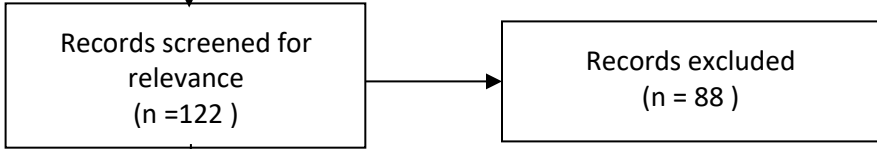

Included

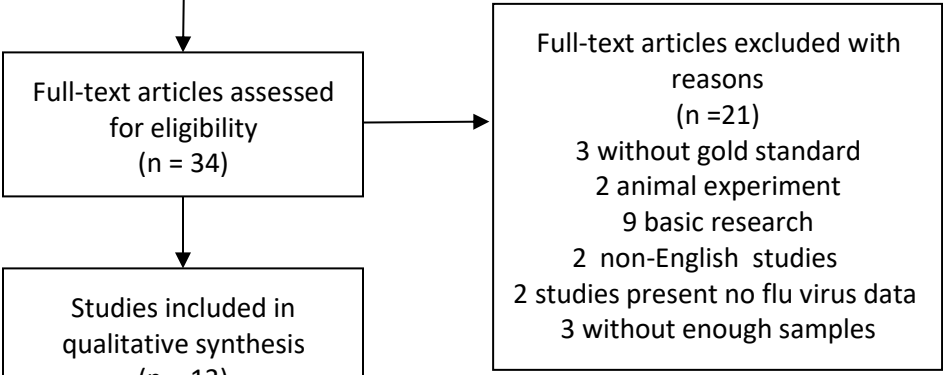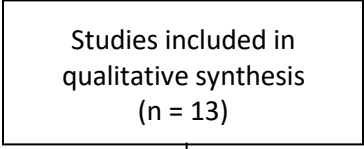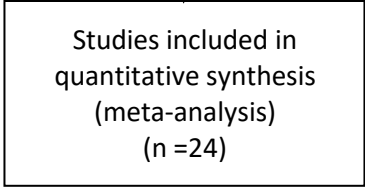

Supplement: f1 [file 3969868.f1.pdf]
